# Supplementary material for: Full-length multiplexed 16S rRNA gene sequencing works well in self-collected decade old cervicovaginal fluid on paper cards
Source: Research Square preprint supplement (doi:10.21203/rs.3.rs-7075538/v1), 2025-07-23
Supplement: Supplementary file 1 [file 82fa506f5a57ebc78c36d2b1.docx]

Supplementary

**Supplementary Table 1. KinnexTM 16S barcoding primers.**

| **Sample** | **Forward primer (5’-3’)** | **Reverse primer (5’-3’)** |
| --- | --- | --- |
| 1 | CTACACGACGCTCTTCCGATCTGACTATGACGAGRGTTYGATYMTGGCTCAG | AAGCAGTGGTATCAACGCAGAGCAGACTAGTCRGYTACCTTGTTACGACTT |
| 2 | CTACACGACGCTCTTCCGATCTGACTATGACGAGRGTTYGATYMTGGCTCAG | AAGCAGTGGTATCAACGCAGAGCAGTATGAGCRGYTACCTTGTTACGACTT |
| 3 | CTACACGACGCTCTTCCGATCTAGACTAGCGTAGRGTTYGATYMTGGCTCAG | AAGCAGTGGTATCAACGCAGAGCATGATCGACRGYTACCTTGTTACGACTT |
| 4 | CTACACGACGCTCTTCCGATCTAGTGCGATCGAGRGTTYGATYMTGGCTCAG | AAGCAGTGGTATCAACGCAGAGTACGACAGTCRGYTACCTTGTTACGACTT |
| 5 | CTACACGACGCTCTTCCGATCTAGCATGTACGAGRGTTYGATYMTGGCTCAG | AAGCAGTGGTATCAACGCAGAGCAGCTGACATRGYTACCTTGTTACGACTT |
| 6 | CTACACGACGCTCTTCCGATCTACGCTCAGTGAGRGTTYGATYMTGGCTCAG | AAGCAGTGGTATCAACGCAGAGCAGTATGAGCRGYTACCTTGTTACGACTT |
| 7 | CTACACGACGCTCTTCCGATCTAGTGCGATCGAGRGTTYGATYMTGGCTCAG | AAGCAGTGGTATCAACGCAGAGACGATGACGTRGYTACCTTGTTACGACTT |
| 8 | CTACACGACGCTCTTCCGATCTACGCTCAGTGAGRGTTYGATYMTGGCTCAG | AAGCAGTGGTATCAACGCAGAGTGCATACTGCRGYTACCTTGTTACGACTT |
| 9 | CTACACGACGCTCTTCCGATCTGACGCATAGTAGRGTTYGATYMTGGCTCAG | AAGCAGTGGTATCAACGCAGAGACGATGACGTRGYTACCTTGTTACGACTT |
| 10 | CTACACGACGCTCTTCCGATCTAGTGCGATCGAGRGTTYGATYMTGGCTCAG | AAGCAGTGGTATCAACGCAGAGCAGACTAGTCRGYTACCTTGTTACGACTT |
| 11 | CTACACGACGCTCTTCCGATCTAGTGCGATCGAGRGTTYGATYMTGGCTCAG | AAGCAGTGGTATCAACGCAGAGCGATGATGCTRGYTACCTTGTTACGACTT |
| 12 | CTACACGACGCTCTTCCGATCTGACGCATAGTAGRGTTYGATYMTGGCTCAG | AAGCAGTGGTATCAACGCAGAGCGATGATGCTRGYTACCTTGTTACGACTT |
| 13 | CTACACGACGCTCTTCCGATCTAGATCGCATGAGRGTTYGATYMTGGCTCAG | AAGCAGTGGTATCAACGCAGAGTCGCATGACTRGYTACCTTGTTACGACTT |
| 14 | CTACACGACGCTCTTCCGATCTAGCATGTACGAGRGTTYGATYMTGGCTCAG | AAGCAGTGGTATCAACGCAGAGACGATGACGTRGYTACCTTGTTACGACTT |
| 15 | CTACACGACGCTCTTCCGATCTGTACTGTCAGAGRGTTYGATYMTGGCTCAG | AAGCAGTGGTATCAACGCAGAGTGACTGTAGCRGYTACCTTGTTACGACTT |
| 16 | CTACACGACGCTCTTCCGATCTAGCATGTACGAGRGTTYGATYMTGGCTCAG | AAGCAGTGGTATCAACGCAGAGTACGACAGTCRGYTACCTTGTTACGACTT |
| 17 | CTACACGACGCTCTTCCGATCTACGCTCAGTGAGRGTTYGATYMTGGCTCAG | AAGCAGTGGTATCAACGCAGAGCAGACTAGTCRGYTACCTTGTTACGACTT |
| 18 | CTACACGACGCTCTTCCGATCTGACTATGACGAGRGTTYGATYMTGGCTCAG | AAGCAGTGGTATCAACGCAGAGCTCAGCATACRGYTACCTTGTTACGACTT |
| 19 | CTACACGACGCTCTTCCGATCTGACTATGACGAGRGTTYGATYMTGGCTCAG | AAGCAGTGGTATCAACGCAGAGACGATGACGTRGYTACCTTGTTACGACTT |
| 20 | CTACACGACGCTCTTCCGATCTACGCTCAGTGAGRGTTYGATYMTGGCTCAG | AAGCAGTGGTATCAACGCAGAGTACGACAGTCRGYTACCTTGTTACGACTT |
| NTC | CTACACGACGCTCTTCCGATCTACGCTCAGTGAGRGTTYGATYMTGGCTCAG | AAGCAGTGGTATCAACGCAGAGCTCAGCATACRGYTACCTTGTTACGACTT |
| Dried 1 PTC | CTACACGACGCTCTTCCGATCTGACGCATAGTAGRGTTYGATYMTGGCTCAG | AAGCAGTGGTATCAACGCAGAGCAGCTGACATRGYTACCTTGTTACGACTT |
| Dried 2 PTC | CTACACGACGCTCTTCCGATCTAGTGCGATCGAGRGTTYGATYMTGGCTCAG | AAGCAGTGGTATCAACGCAGAGCAGCTGACATRGYTACCTTGTTACGACTT |
| Dried 3 PTC | CTACACGACGCTCTTCCGATCTGACTATGACGAGRGTTYGATYMTGGCTCAG | AAGCAGTGGTATCAACGCAGAGCAGCTGACATRGYTACCTTGTTACGACTT |
| Wet PTC | CTACACGACGCTCTTCCGATCTGACGCATAGTAGRGTTYGATYMTGGCTCAG | AAGCAGTGGTATCAACGCAGAGCAGACTAGTCRGYTACCTTGTTACGACTT |

**Supplementary Table 2. Uniprot proteome IDs for bacteria with ≥ 1 % total 16S short or long reads.**

| **Proteome_ID** | **Species** |
| --- | --- |
| UP000234775 | *Aerococcus christensenii* |
| UP000016519 | *Alloscardovia omnicolens* |
| UP000005984 | *Anaerococcus lactolyticus* |
| UP000003191 | *Bifidobacterium breve* |
| UP000003503 | *Dialister micraerophilus* |
| UP000005947 | *Fannyhessea vaginae* |
| UP000005392 | *Fusobacterium animalis* |
| UP000002521 | *Fusobacterium nucleatum* |
| UP000258888 | *Gardnerella vaginalis* |
| UP000255264 | *Haemophilus pittmaniae* |
| UP000004115 | *Lactobacillus iners* |
| UP000003242 | *Megasphaera lornae* |
| UP000002631 | *Mycoplasma hominis* |
| UP000004206 | *Peptostreptococcus anaerobius* |
| UP000002786 | *Prevotella bivia* |
| UP000033103 | *Sneathia vaginalis* |
| UP000000423 | *Ureaplasma parvum* |
| UP000029628 | *Veillonella montpellierensis* |
| UP000003744 | *Anaerococcus tetradius* |
| UP000253807 | *Haemophilus parainfluenzae* |
| UP000067598 | *Lactobacillus crispatus* |
| UP000189488 | *Lactobacillus gasseri* |
| UP000327236 | *Lactobacillus jensenii* |
| UP000318911 | *Lactobacillus mulieris* |
| UP000070160 | *Megasphaera hutchinsoni* |
| UP000070531 | *Prevotella amnii* |
| UP000254072 | *Prevotella disiens* |
| UP001254699 | *Sneathia sanguinegens* |
| UP000238573 | *Streptococcus anginosus* |
| UP000008693 | *Bifidobacterium dentium* |
| UP000005388 | *Streptococcus urinalis* |
| UP000189488 | *Lactobacillus gasseri* |
| UP000000821 | *Streptococcus agalactiae* |
| UP000000625 | *Escherichia coli* |
| UP000008816 | *Staphylococcus aureus* |
| UP000000431 | *Chlamydia trachomatis* |
| UP000005640 | *Homo sapiens* |

**Supplementary Table 3. Paired pairwise Mann-Whitney comparisons between different subset reads.**

| **Group 1** | **Group 2** | **P-value** | **Bonferroni P-value** |
| --- | --- | --- | --- |
| All | 10000 | < 0.001 | < 0.001 |
| All | 5000 | < 0.001 | < 0.001 |
| All | 1000 | < 0.001 | < 0.001 |
| All | 500 | < 0.001 | < 0.001 |
| All | 200 | < 0.001 | < 0.001 |
| 10000 | 5000 | < 0.001 | 0.003 |
| 10000 | 1000 | < 0.001 | < 0.001 |
| 10000 | 500 | < 0.001 | < 0.001 |
| 10000 | 200 | < 0.001 | < 0.001 |
| 5000 | 1000 | < 0.001 | 0.005 |
| 5000 | 500 | < 0.001 | < 0.001 |
| 5000 | 200 | < 0.001 | < 0.001 |
| 1000 | 500 | 0.08 | 1.000 |
| 1000 | 200 | 0.001 | 0.016 |
| 500 | 200 | 0.205 | 1.000 |
